# Supplementary material for: Bacterial dioxygenase- and monooxygenase-catalysed sulfoxidation of benzo[b]thiophenes
Source: Royal Society of Chemistry journal article supplement (doi:10.1039/c1ob06678a), 2011-12-02

# Supporting Information

## Bacterial dioxygenase- and monooxygenase-catalysed sulfoxidation of benzo[*b*]thiophenes

D. R. Boyd,\*<sup>a</sup> N. D. Sharma, B. McMurray, S. A. Haughey, C. C. R. Allen, J. T. G. Hamilton, W. C. McRoberts, R. A. More O'Ferrall, J. Nikodinovic-Runic, Lydie A. Coulombel, K. E. O'Connor\*<sup>b</sup>

\*<sup>a</sup> *School of Chemistry and Chemical Engineering, and School of Biological Sciences, Queen's University of Belfast, Belfast BT9 5AG, UK;*  
*E-mail: [dr.boyd@qub.ac.uk](mailto:dr.boyd@qub.ac.uk)*

\*<sup>b</sup> *School of Biomolecular and Biomedical Sciences and Centre for Synthesis and Chemical Biology, University College Dublin, Belfield, Dublin 4, Ireland;*  
*E-mail: [kevin.oconnor@ucd.ie](mailto:kevin.oconnor@ucd.ie)*

## Index of Spectra

|                                                                                   |   |
|-----------------------------------------------------------------------------------|---|
| Copy of <sup>1</sup> H NMR spectrum of compound <b>8</b> (NMR 1)                  | 2 |
| Copy of <sup>13</sup> C NMR spectrum of compound <b>8</b> (NMR 2)                 | 3 |
| Copy of <sup>1</sup> H NMR spectrum of compound <b>18</b> (NMR 3)                 | 4 |
| Copy of <sup>1</sup> H NMR spectrum of compound <b>10<sub>trans</sub></b> (NMR 4) | 5 |
| Copy of ECD spectra of compounds (-)- <b>18</b> and (-)- <b>23</b>                | 6 |
| Table 2: Racemisation data of compound <b>18</b> (25 and 50°C)                    | 7 |
| Graph: Racemisation of compound <b>18</b> at 25 °C                                | 8 |
| Graph: Racemisation of compound <b>18</b> at 50 °C                                | 9 |

### NMR: 1

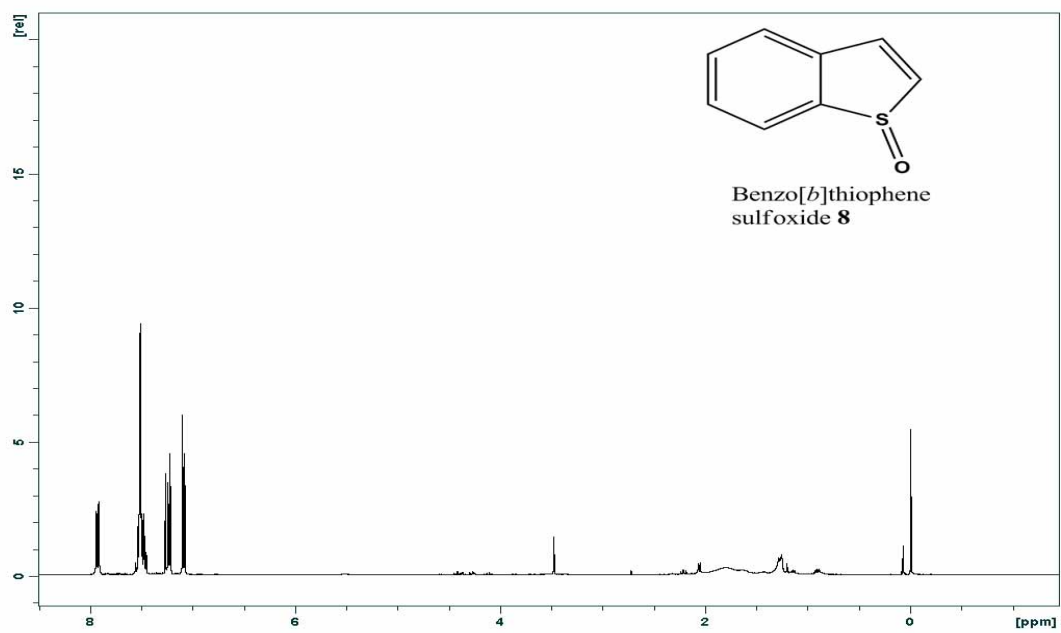

## NMR: 2

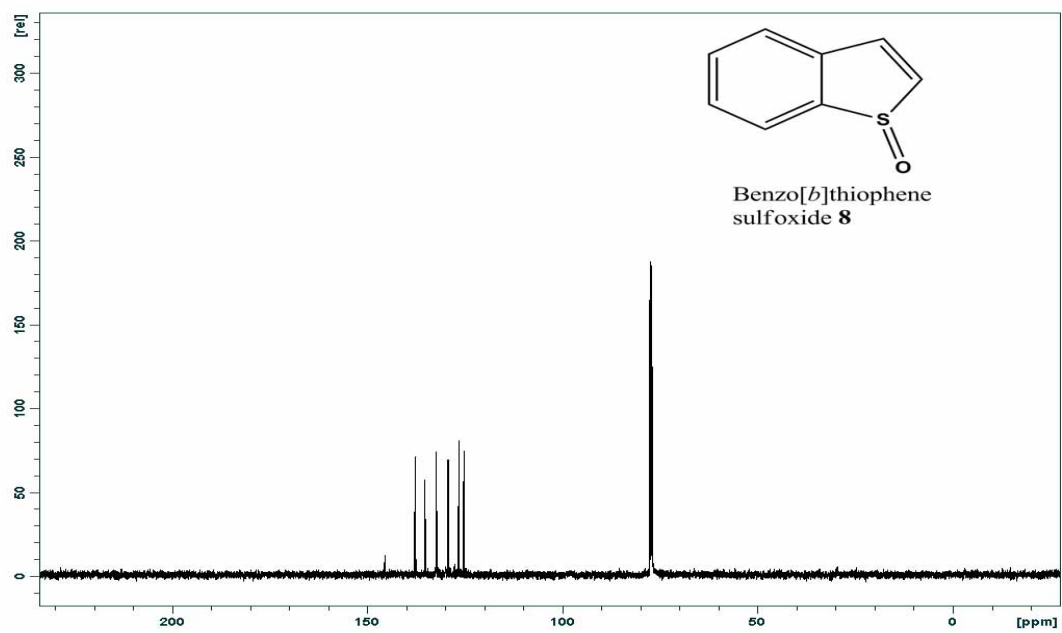

### NMR: 3

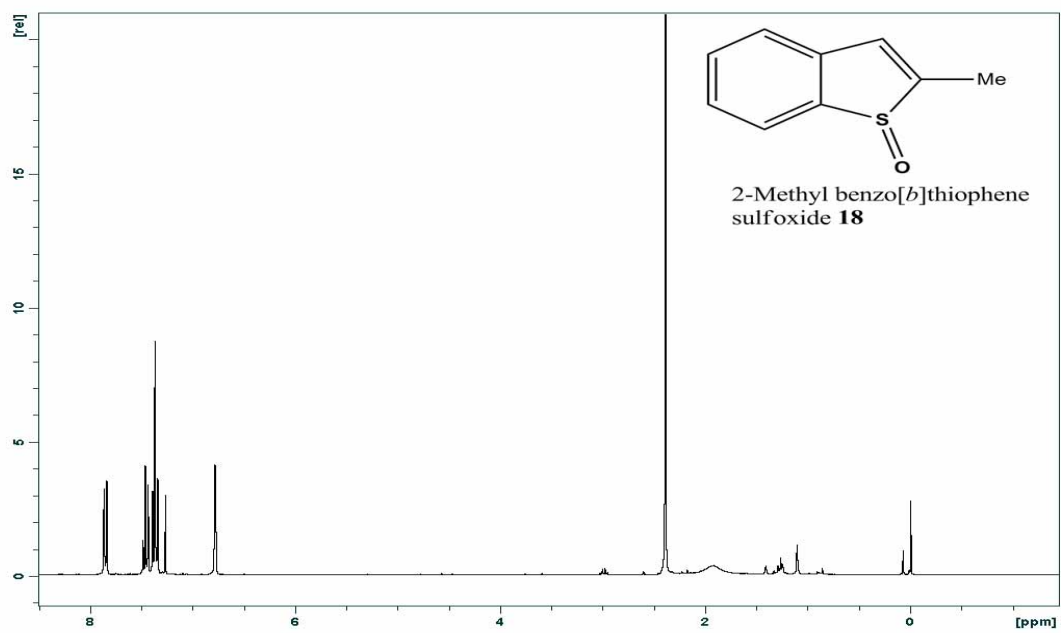

NMR 4

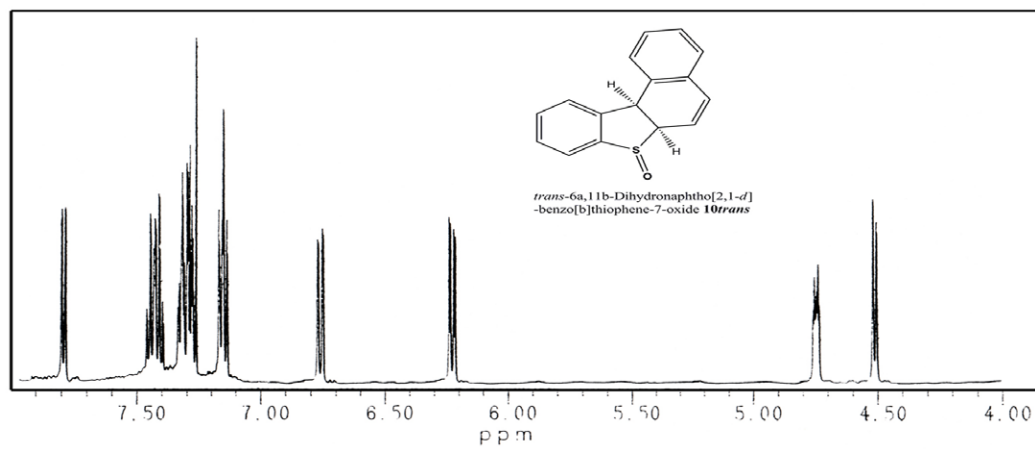

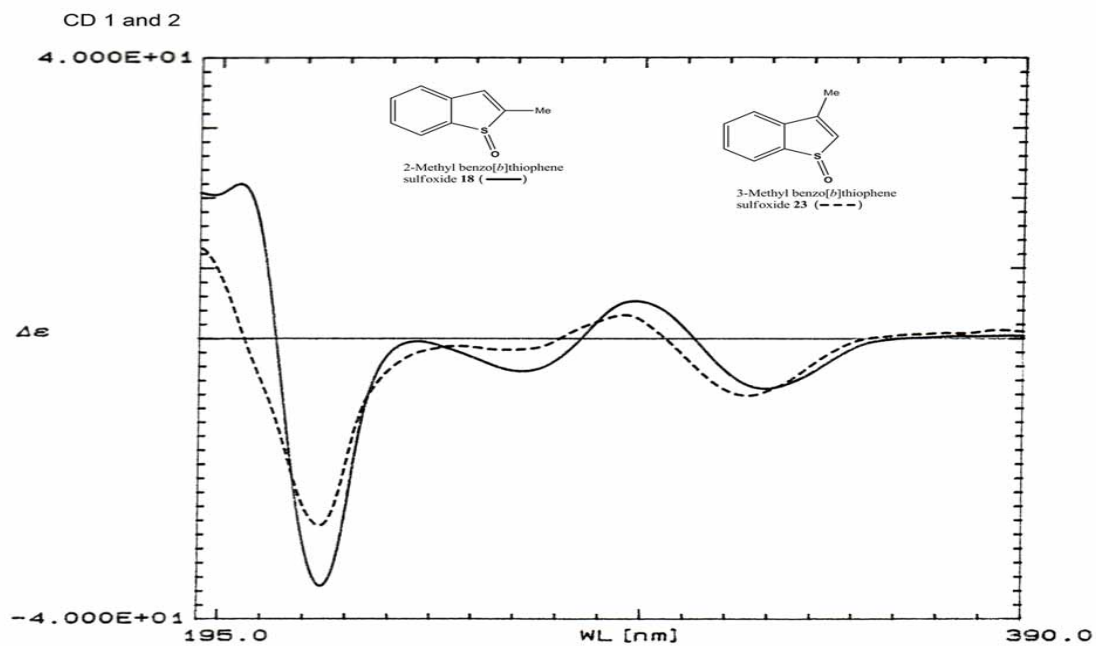

**Table 2 (part a)** Measurement of optical rotation  $[\alpha]_D$  with time (t) (c. 0.41 in  $\text{CHCl}_3$ ) at 25°C for metabolite (-)-**18**.  
**Table 2 (part b)** Measurement of optical rotation  $[\alpha]_D$  with time (t) (c. 0.2 in  $\text{CHCl}_3$ ) at 50°C for metabolite (-)-**18**.

| time t/min | rotation $\alpha$ | $\log_{10}\alpha$ | time t/min | rotation $\alpha$ | $\log_{10}\alpha \times 10^{-1}$ |
|------------|-------------------|-------------------|------------|-------------------|----------------------------------|
| 4          | -1.951            | 0.290             | 1.5        | -0.816            | -0.883                           |
| 144        | -1.912            | 0.281             | 41.5       | -0.684            | -1.649                           |
| 284        | -1.871            | 0.272             | 81.5       | -0.573            | -2.422                           |
| 424        | -1.832            | 0.263             | 121.6      | -0.483            | -3.160                           |
| 564        | -1.794            | 0.254             | 161.6      | -0.405            | -3.925                           |
| 705        | -1.757            | 0.245             | 201.7      | -0.340            | -4.685                           |
| 845        | -1.721            | 0.236             | 241.7      | -0.288            | -5.410                           |
| 985        | -1.686            | 0.227             | 281.8      | -0.243            | -6.144                           |
| 1125       | -1.652            | 0.218             | 321.8      | -0.205            | -6.882                           |
| 1265       | -1.618            | 0.209             | 361.8      | -0.174            | -7.544                           |
| -          | -                 | -                 | 401.9      | -0.145            | -8.386                           |
| -          | -                 | -                 | 441.9      | -0.126            | -9.014                           |
| -          | -                 | -                 | 81.0       | -0.107            | -9.706                           |

Results at T= 25°C:

$$\text{Gradient} = 6.393 \times 10^{-5} \text{ min}^{-1}$$

$$= 1.066 \times 10^{-6} \text{ s}^{-1}$$

$$k = 2.454 \times 10^{-6} \text{ s}^{-1}$$

$$\therefore \Delta G^\ddagger = 25.06 \text{ kcal mol}^{-1}$$

Results at T= 50°C:

$$\text{Gradient} = 1.852 \times 10^{-3} \text{ min}^{-1}$$

$$= 3.086 \times 10^{-5} \text{ s}^{-1}$$

$$k = 7.108 \times 10^{-5} \text{ s}^{-1}$$

$$\therefore \Delta G^\ddagger = 25.06 \text{ kcal mol}^{-1}$$

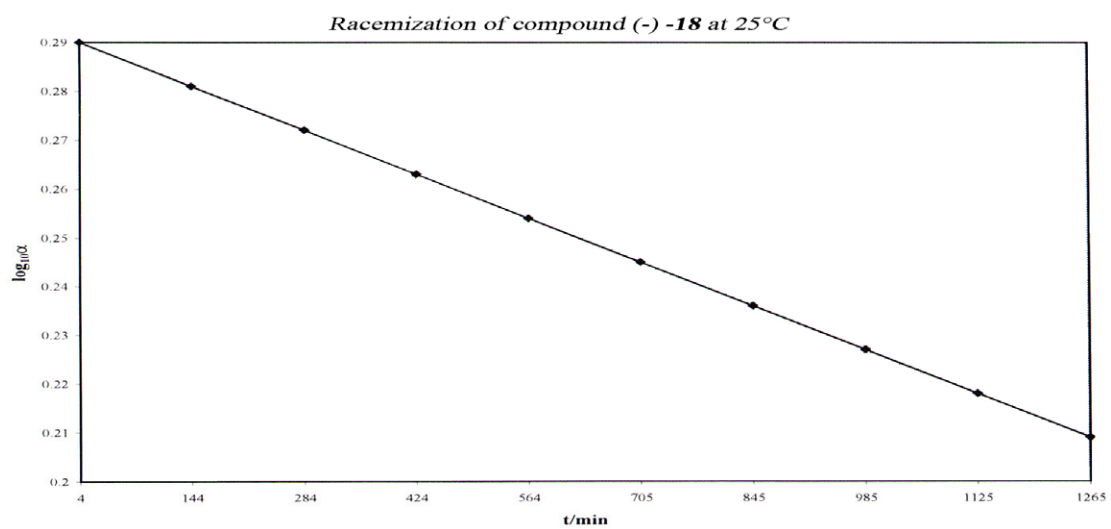



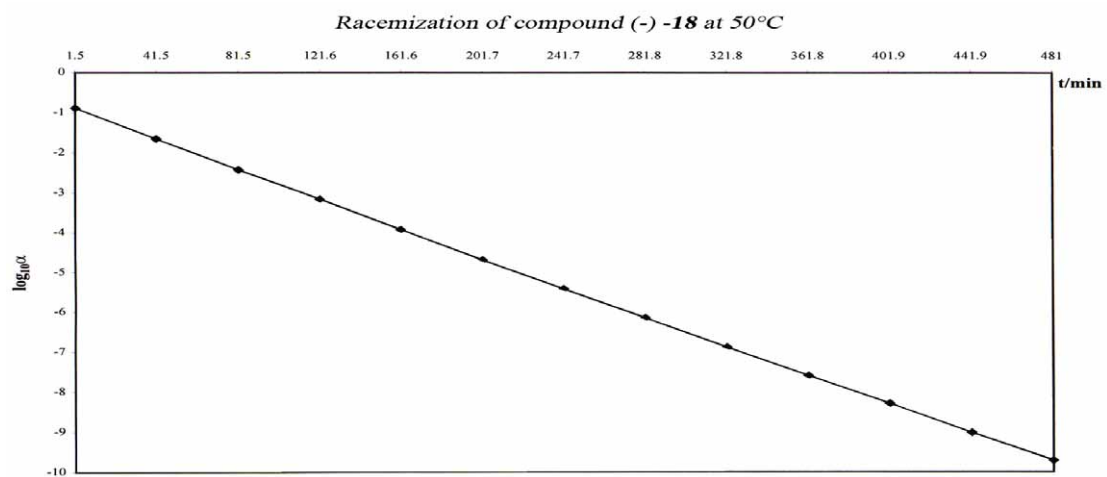

Supplement: c1ob06678a.pdf [file c1ob06678a.pdf]
